# Supplementary material
Source: PubMed Central journal article supplement (PMC6207338)

Uncropped Blot Images for Figure 2h

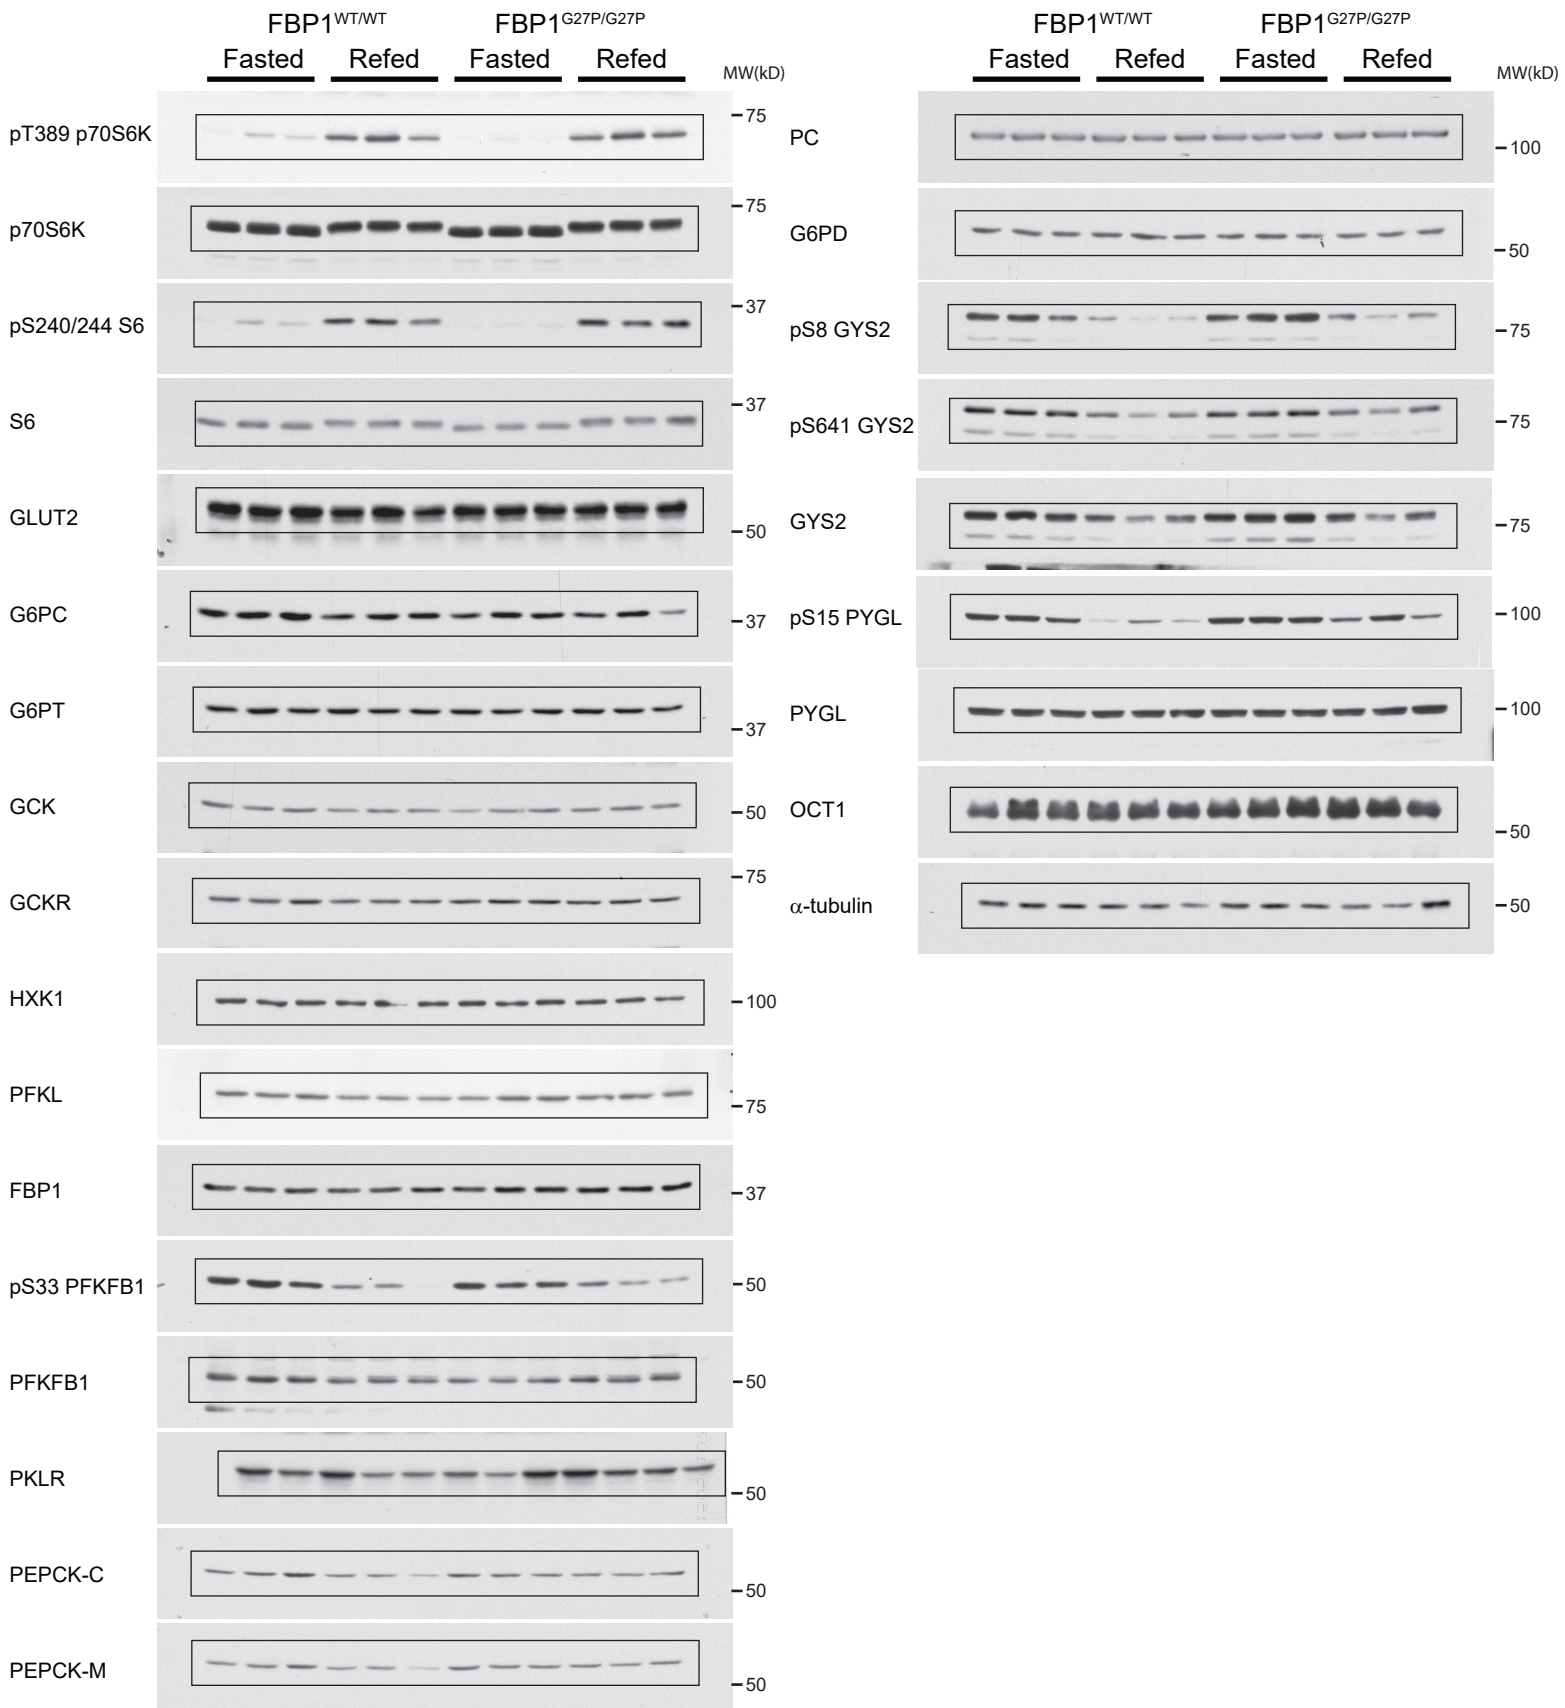

Uncropped Blot Images for Figure 4k

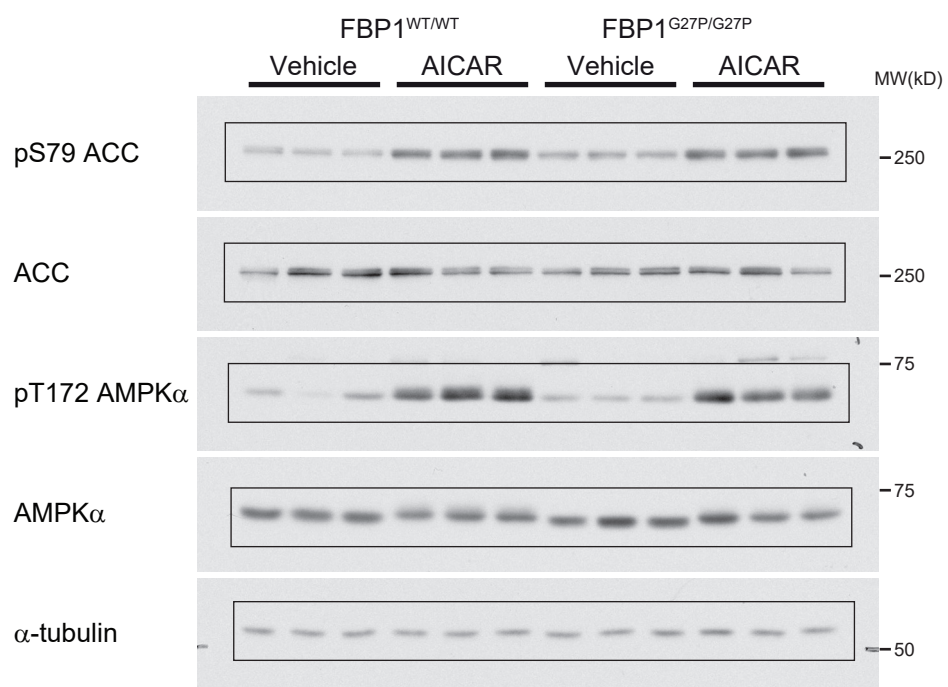

Uncropped Blot Images for Figure 5d

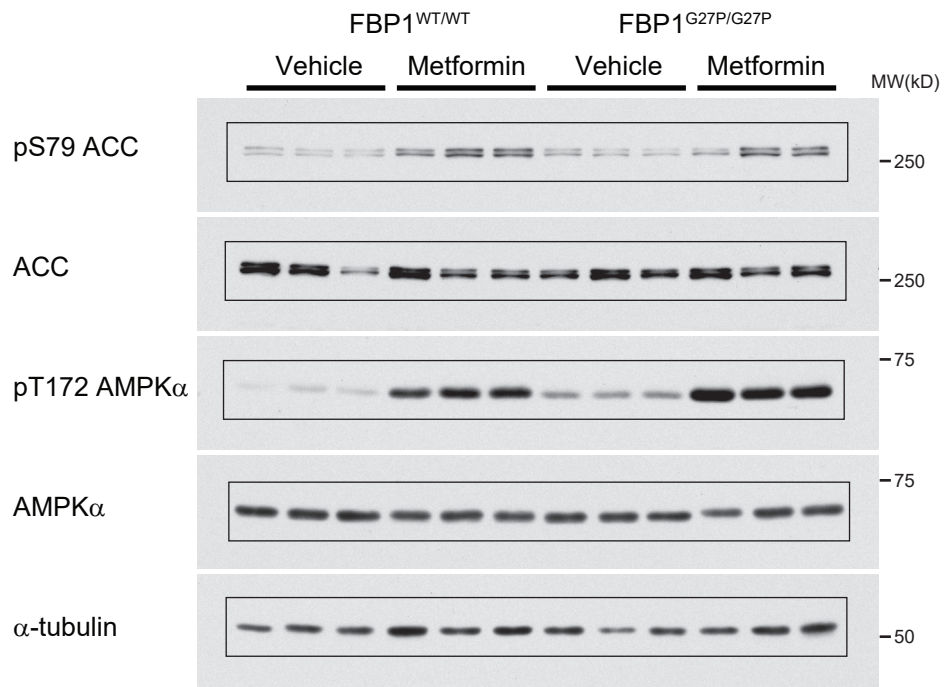

Uncropped Blot Images for Supplementary Figure 6a

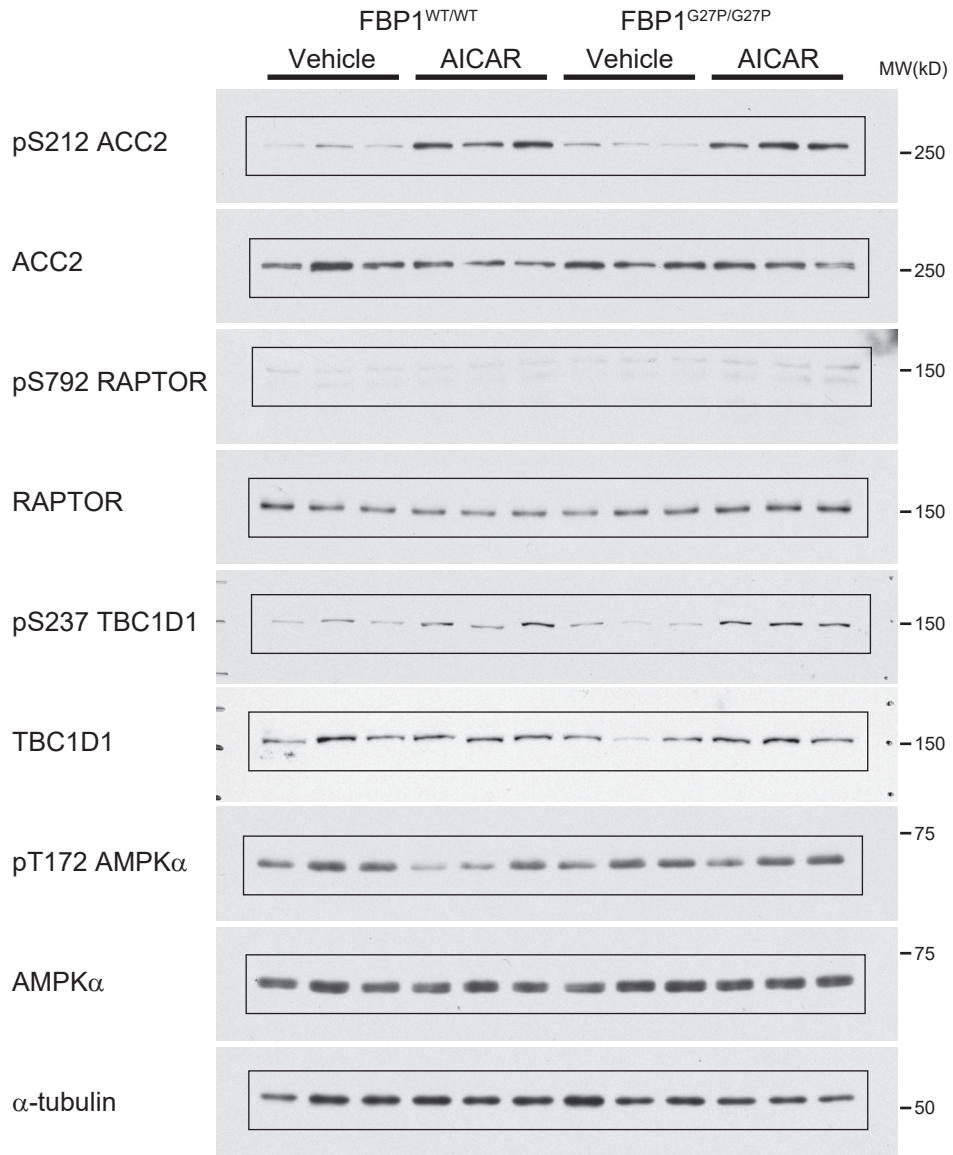

Supplement: NIHMS78767-supplement-2.pdf [file NIHMS78767-supplement-2.pdf]
